# Supplementary material
Source: PubMed Central journal article supplement (PMC4707081)
Supplement: NIHMS739640-supplement.pdf [file NIHMS739640-supplement.pdf]

# Supplemental Information

---

## Title

Changes in the enhancer landscape during early placental development uncover a trophoblast invasion gene-enhancer network.

## Authors

Geetu Tuteja<sup>1</sup>, Tisha Chung<sup>1</sup>, and Gill Bejerano<sup>1,2,3,\*</sup>

1 Department of Developmental Biology, Stanford University

2 Department of Computer Science, Stanford University

3 Division of Medical Genetics, Department of Pediatrics, Stanford University

\* To whom correspondence should be addressed at [bejerano@stanford.edu](mailto:bejerano@stanford.edu)  
Beckman Center B-300, 279 Campus Drive West, Stanford, CA, 94305, USA.

**A**

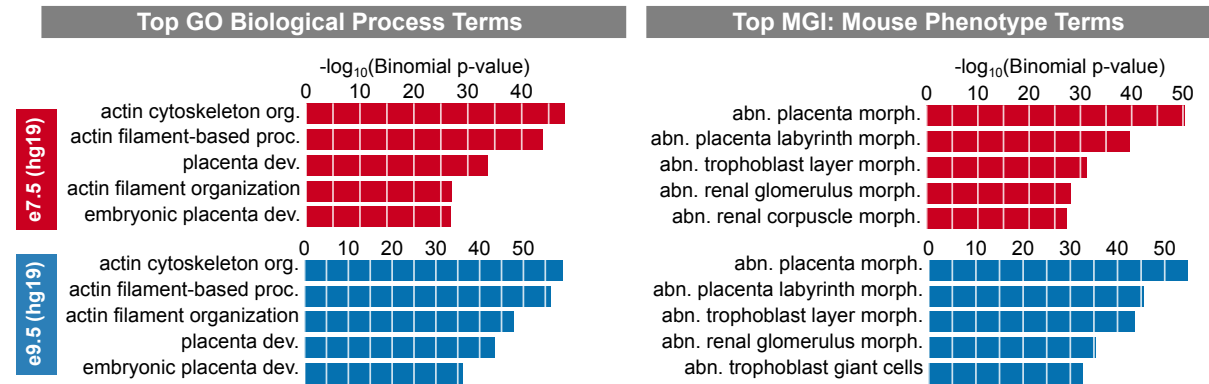

**B**

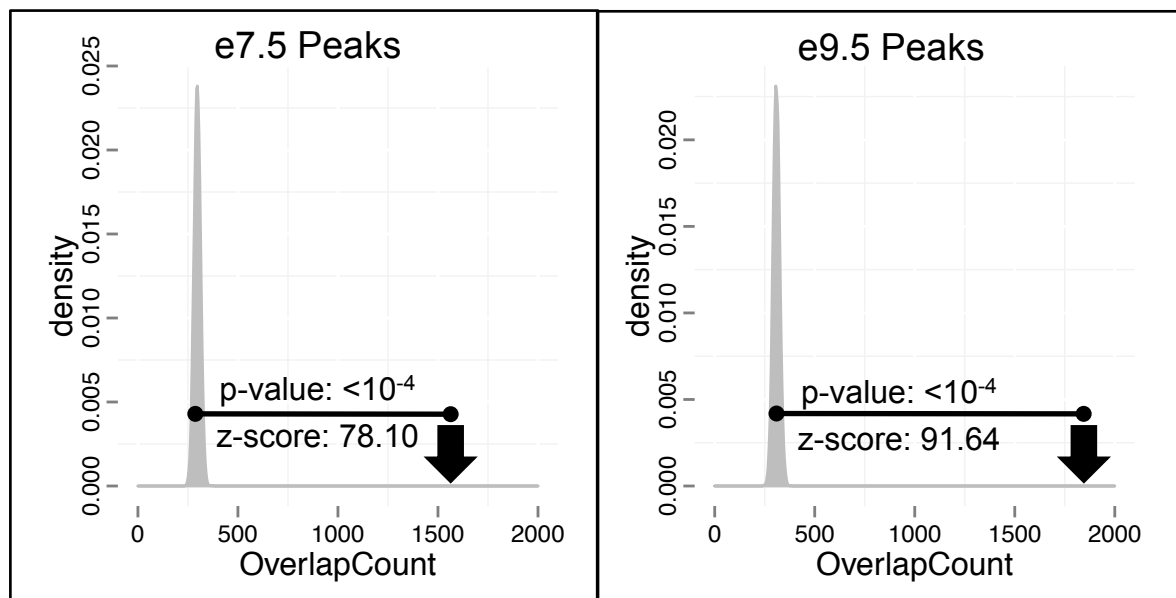

**Figure S1. Mouse E7.5 and e9.5 placenta H3k27Ac peaks are relevant to human.**

(A) Enrichment analysis using GREAT for human (hg19) after mapping mouse peaks to orthologous human coordinates shows peaks are still associated with placental genes. (B) e7.5 and e9.5 peaks have significant overlap with human placenta (85-113 days) DNase-Seq data.

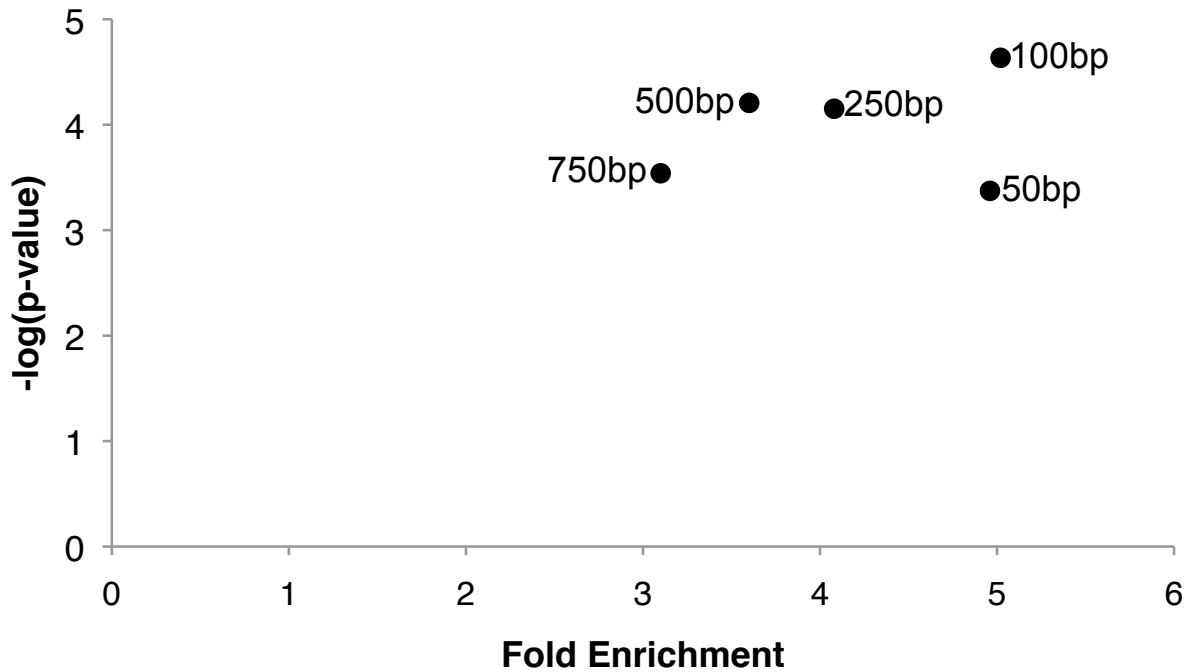

**Figure S2. AP1 and Ets motif within 100bp of one other are most enriched for cell migration terms.**

Shown are the  $-\log(p\text{-value})$  vs. Fold Enrichment for the term “regulation of cell motility” for sets of e7.5-specific enhancers with AP1 and Ets motifs separated by 50bp, 100bp, 250bp, 500bp, or 750bp. Enhancers with the motifs within 100bp of each other show the most significant enrichment for this term.

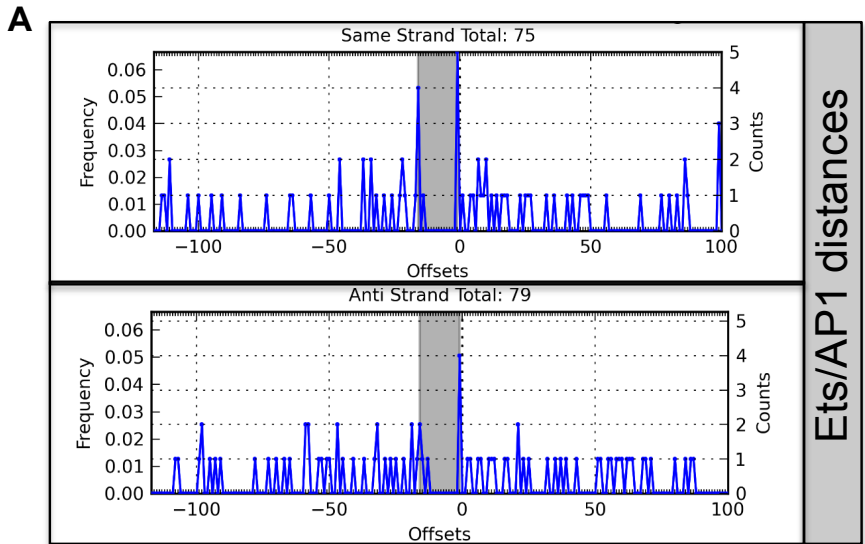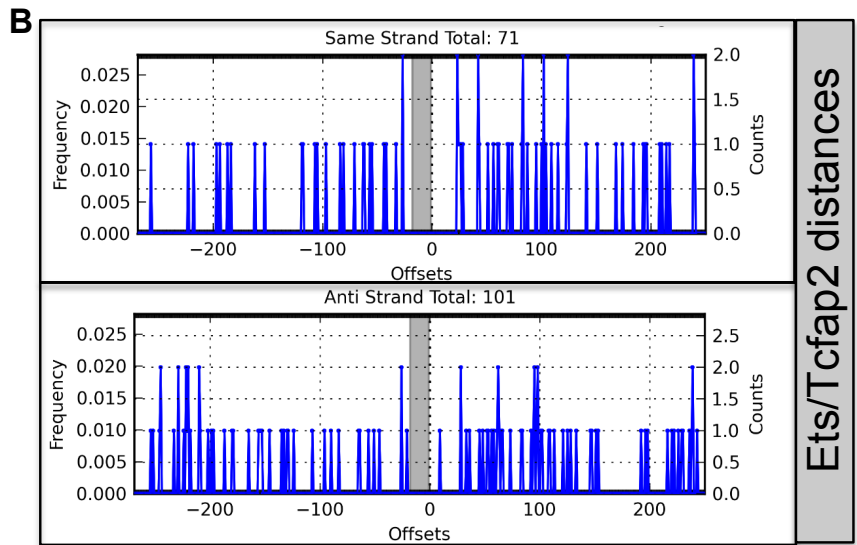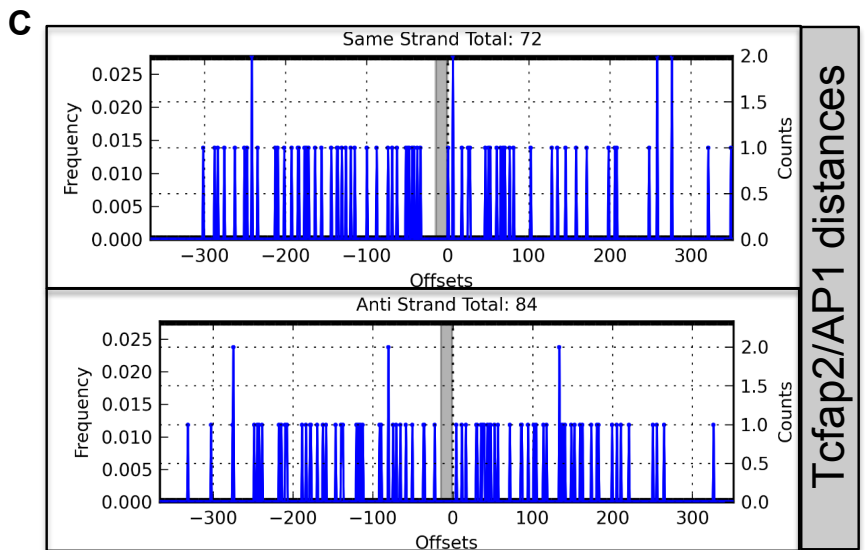

**Figure S3. Distance between each pair of AP1, Ets, and Tcfap2 motifs.**

Distances between Ets and AP1 motifs (A), Ets and Tcfap2 motifs (B), and Tcfap2 and AP1 motifs (C) in the set of 108 enhancers from Figure 3C are shown. Motifs do not prefer specific spacing or orientation relative to one another.

**A**

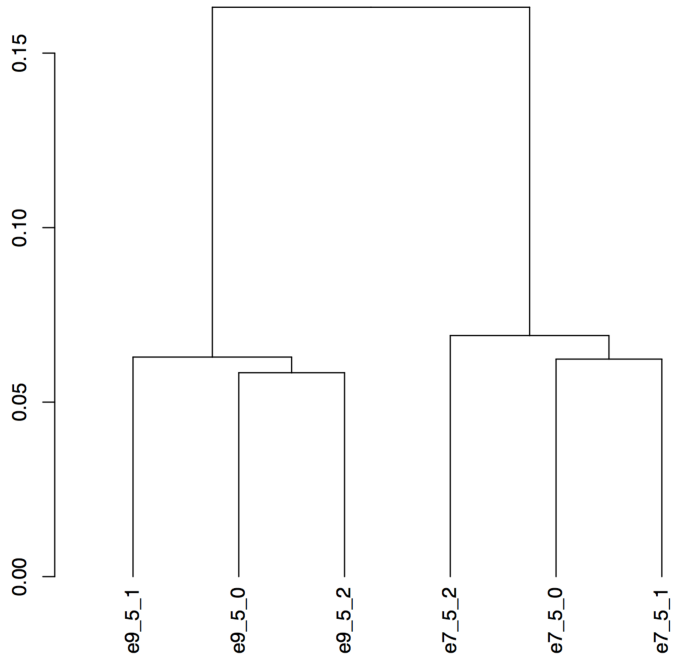

**B**

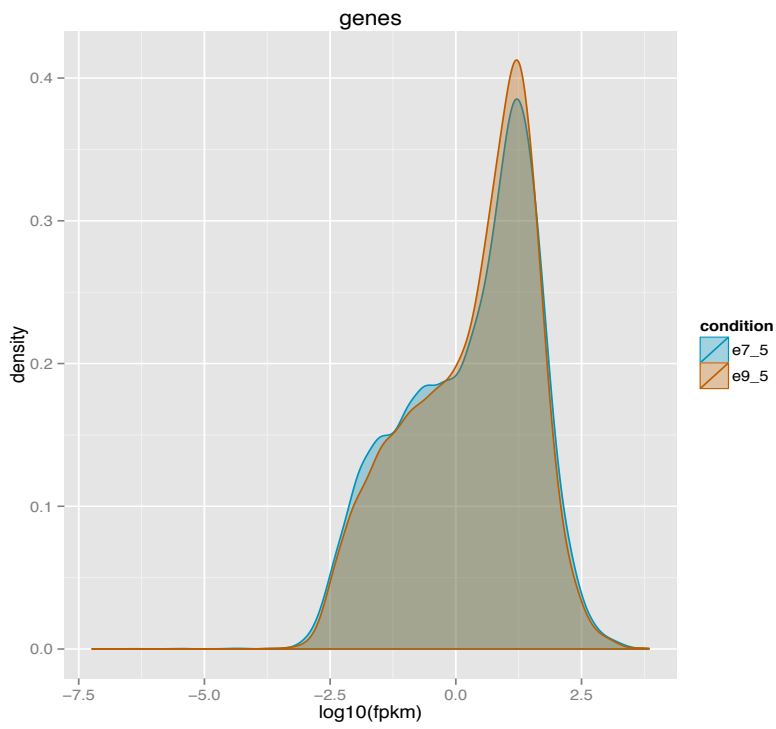

**Figure S4. RNA-Seq data quality control.**

(A) E7.5 RNA-Seq data replicates cluster with one another, as do e9.5 RNA-Seq data replicates. Clustering is based on gene FPKM values. (B) FPKM distributions for e7.5 and e9.5 are similar.

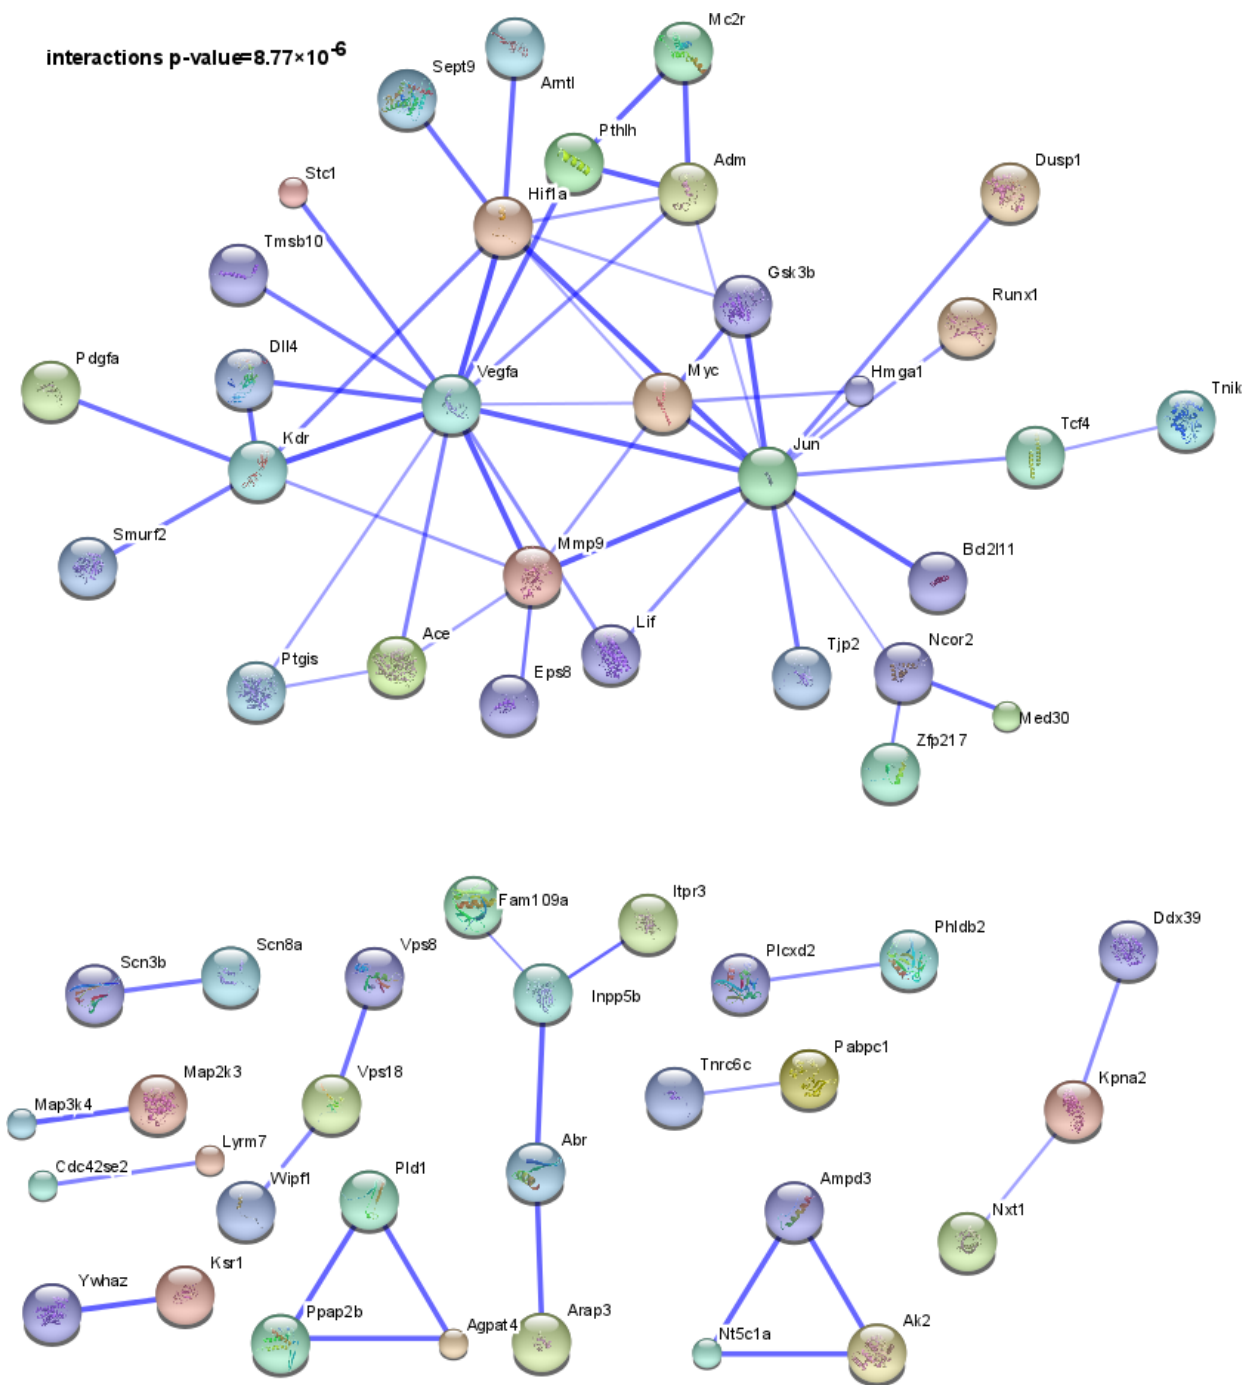

**Figure S5. Genes with AP1/Ets/Tcfap2 enhancers are enriched for interactions.** String-db network showing known/predicted interactions between genes with AP1/Ets/Tcfap2 enhancers. Interactions p-value= $8.77 \times 10^{-6}$ .



**Table S1.** Number of reads that uniquely align to mm9 with up to 2 mismatches.

| Time point | Replicate 1<br>(H3k27Ac) | Replicate 2<br>(H3k27Ac) | Replicate 1<br>(Input) | Replicate 2<br>(Input) |
|------------|--------------------------|--------------------------|------------------------|------------------------|
| e7.5       | 29,526,188               | 27,274,271               | 26,997,654             | 25,226,807             |
| e9.5       | 26,527,620               | 29,376,051               | 24,541,293             | 15,296,868             |

**Table S2.** List of primers used to clone candidate regions in Figure 1B. Sequences listed are for mm9.

| Element name | Forward                 | Reverse              |
|--------------|-------------------------|----------------------|
| mPL-II       | CTGGAGGCAAATGGTAAAGG    | CCAAGGATGATCCAGCAAAT |
| Agps         | AAAGTGAAGAACGATTGAGACCA | TGCCACGTGTGTGCTGA    |
| Cbx7         | GGGACTCCCAGCACACG       | CAGCCGCCTACATTCTGT   |
| Ets2         | TCCCCACTTCCATCCTCA      | GCTGCAGCCTGCTCTGA    |
| Fosb         | AGGGCGGGGCTTGTT         | CACCACATCTGGCTTCAATC |
| Klf7         | CCCCAAACACACACACA       | GGCTCGCTGCCTTGC      |
| Mmp9         | AGGGGGTCAGGTTTTTTC      | CAGTGGGTAAGCAGTGGGTA |
| Mrpl14       | GGGGCAGTTGGGAGGA        | GCTTGGGCCTGTGGTG     |
| Mtss1        | CCCAAACAGCACCACCA       | CAACAGTGGCCAGAGC     |
| Ndufa13      | TGTGTGTTTTCAACATAGACAGG | CCAGGTCCACTGACTGTGC  |
| Pias1        | GGCTAGGTACCCCAATCA      | GCTGCCTTTTGCTTGCTC   |
| Ppard        | GCCAGGCCACTCTGCT        | CCCCAGCCTGCACAGA     |
| Prkch        | TCCCTAAGGACCCTTCCA      | TGAGGGGCTCGTGTGTA    |
| Rcan1        | CCTGGCACGCCTGGT         | TGCAGCACAGTTCCTTGG   |
| Tcf7l2       | TGGCTGTGTCCTGGTGAG      | GGAAGCCCCTCTTATCTGC  |
| Thal         | GGGACTTGGAAGCCTA        | GGAATCCTGGAGGACTACTG |

**Table S3.** Genes associated with enhancers tested in Figure 1B are expressed in trophoblast giant cells. The gene expression data is from Hannibal et al, 2014.

| Gene name | Normalized expression value | Percentile of expression |
|-----------|-----------------------------|--------------------------|
| Agps      | 124.24                      | 26.3                     |
| Cbx7      | 1880.30                     | 5.4                      |
| Ets2      | 170.02                      | 23.3                     |
| Fosb      | 553.54                      | 13.7                     |
| Klf7      | 44.59                       | 38.9                     |
| Mmp9      | 1323.31                     | 7.4                      |
| Mrpl14    | 5662.77                     | 1.3                      |
| Mtss1     | 105.05                      | 28.0                     |
| Ndufa13   | 4330.33                     | 1.8                      |
| Pias1     | 233.92                      | 20.0                     |
| Ppard     | 1114.58                     | 8.5                      |

|        |        |      |
|--------|--------|------|
| Prkch  | 47.81  | 37.9 |
| Rcan1  | 641.27 | 12.7 |
| Tcf7l2 | 25.36  | 47.2 |
| Tha1   | N/A    | N/A  |

**Table S4.** E7.5-specific peaks are significantly associated with genes up-regulated at e7.5 but not e9.5. Genes are considered up-regulated if the FPKM>1 and FPKM fold between the two time points is  $\geq 1.5$ .

| Gene Set (# genes)           | p-value                 | Fold enrichment | # peaks assoc. with gene set |
|------------------------------|-------------------------|-----------------|------------------------------|
| Up-regulated at e7.5 (1,681) | $5.41 \times 10^{-220}$ | 3.15            | 841                          |
| Up-regulated at e9.5 (2,432) | 0.617                   | 0.99            | 287                          |
